# Supplementary material for: Mixed reality or LEGO game play? Fostering social interaction in children with Autism
Source: Springer Nature journal article supplement (doi:10.1007/s10055-021-00580-9), 2021-09-23
Supplement: 10055_2021_580_MOESM1_ESM.pdf [file 10055_2021_580_MOESM1_ESM.pdf]

## Questionnaires

| <b>questionnaire STAIC_state</b> |            |          |       |
|----------------------------------|------------|----------|-------|
| Right now, I feel calm           | Not at all | Somewhat | A lot |
| Right now, I feel upset          | Not at all | Somewhat | A lot |
| Right now, I feel pleasant       | Not at all | Somewhat | A lot |
| Right now, I feel nervous        | Not at all | Somewhat | A lot |
| Right now, I feel jittery        | Not at all | Somewhat | A lot |
| Right now, I feel rested         | Not at all | Somewhat | A lot |
| Right now, I feel scared         | Not at all | Somewhat | A lot |
| Right now, I feel relaxed        | Not at all | Somewhat | A lot |
| Right now, I feel worried        | Not at all | Somewhat | A lot |
| Right now, I feel satisfied      | Not at all | Somewhat | A lot |
| Right now, I feel frightened     | Not at all | Somewhat | A lot |
| Right now, I feel happy          | Not at all | Somewhat | A lot |
| Right now, I feel sure           | Not at all | Somewhat | A lot |
| Right now, I feel good           | Not at all | Somewhat | A lot |
| Right now, I feel troubled       | Not at all | Somewhat | A lot |
| Right now, I feel bothered       | Not at all | Somewhat | A lot |
| Right now, I feel nice           | Not at all | Somewhat | A lot |
| Right now, I feel terrified      | Not at all | Somewhat | A lot |
| Right now, I feel mixed-up       | Not at all | Somewhat | A lot |
| Right now, I feel cheerful       | Not at all | Somewhat | A lot |

### **Affective Slider scales**

|                                          |                                                                                                                                                 |
|------------------------------------------|-------------------------------------------------------------------------------------------------------------------------------------------------|
| How active do you feel?                  | <p style="text-align: center;">How active do you feel?</p>  |
| What is your mood?                       | <p style="text-align: center;">What is your mood?</p>       |
| How well do you know your partner?       | <p style="text-align: center;">How active do you feel?</p>  |
| Would you like to get to know them more? | <p style="text-align: center;">What is your mood?</p>       |

**The cross tables that the Kappa scores calculated from**

**coder1 \* coder2 Crosstabulation**

Count

|        |                 | coder2         |            |          |                 | Total |
|--------|-----------------|----------------|------------|----------|-----------------|-------|
|        |                 | no-interaction | initiation | response | externalization |       |
| coder1 | no-interaction  | 0              | 0          | 1        | 0               | 1     |
|        | initiation      | 0              | 3          | 0        | 0               | 3     |
|        | response        | 2              | 0          | 1        | 0               | 3     |
|        | externalization | 0              | 0          | 0        | 7               | 7     |
| Total  |                 | 2              | 3          | 2        | 7               | 14    |

**coder1 \* coder3 Crosstabulation**

Count

|        |                 | coder3         |            |          |                 | Total |
|--------|-----------------|----------------|------------|----------|-----------------|-------|
|        |                 | no-interaction | initiation | response | externalization |       |
| coder1 | no-interaction  | 0              | 0          | 1        | 0               | 1     |
|        | initiation      | 0              | 3          | 0        | 0               | 3     |
|        | response        | 0              | 0          | 3        | 0               | 3     |
|        | externalization | 2              | 0          | 0        | 5               | 7     |
| Total  |                 | 2              | 3          | 4        | 5               | 14    |

**coder2 \* coder3 Crosstabulation**

Count

|        |                 | coder3         |            |          |                 | Total |
|--------|-----------------|----------------|------------|----------|-----------------|-------|
|        |                 | no-interaction | initiation | response | externalization |       |
| coder2 | no-interaction  | 0              | 0          | 2        | 0               | 2     |
|        | initiation      | 0              | 3          | 0        | 0               | 3     |
|        | response        | 0              | 0          | 2        | 0               | 2     |
|        | externalization | 2              | 0          | 0        | 5               | 7     |
| Total  |                 | 2              | 3          | 4        | 5               | 14    |

### A detailed explanation of the variable names being used

|                     |                                                                                                                                                                                                                                                                                                                                                                                                          |
|---------------------|----------------------------------------------------------------------------------------------------------------------------------------------------------------------------------------------------------------------------------------------------------------------------------------------------------------------------------------------------------------------------------------------------------|
| hunted_fireflies    | When users bring their nets close to the flocks of fireflies, two insects are caught. This is represented by changing the fireflies' color to match the user's butterfly net color while the rest of the flock moves away from the user.                                                                                                                                                                 |
| time_of_first_char  | This feature is related to the number of hunted fireflies in the first minutes of the game. After hunting a certain amount of fireflies, it was decided that fireflies would transform into a creature that would become a virtual partner for the user.                                                                                                                                                 |
| char_texture_change | In order to maintain user engagement with the system, as users continue hunting insects their creature changes appearance. This mechanic was implemented to foster the children's sense of exploration as they discover different versions of the creatures.                                                                                                                                             |
| point_at_action     | Having the character pointing at something was designed to help the users discover the nearby elements which were interactive, hence it is activated when the character of a user approaches the virtual elements. At that moment, the user's creature points towards the element and makes an exclamatory remark.                                                                                       |
| char_being_idle     | After staying in the playing field without any action, it was decided that the character of the participant would look up towards the participant to catch attention and create engagement.                                                                                                                                                                                                              |
| manipulate_prop     | The virtual elements can only be activated when both users bring their characters close to the element at the same time. When both creatures converge by the object, they will manipulate the virtual element, which will respond with a unique playful animation and then disappear, while the creatures celebrate their discovery.                                                                     |
| merge_char          | When users brought their creatures together, these would combine and create two new creatures, which replaced the old ones. The merge were represented by both creatures jumping towards one another and transforming into a novel creature. Therefore if the children wanted to discover all the creatures that inhabit the virtual world, they had to plan and work together to merge their creatures. |
| char_greeting       | When users' creatures come close to each other, they perform a greeting action towards the other. Therefore, creatures are models of social behaviors for the players, and also try to help                                                                                                                                                                                                              |

|                           |                                                                                                                                                                                                                                         |
|---------------------------|-----------------------------------------------------------------------------------------------------------------------------------------------------------------------------------------------------------------------------------------|
|                           | children understand that there might be potential interactions between virtual elements.                                                                                                                                                |
| area_covered              | The distance covered by each participant which was calculated based on the trajectory of their nets in the playing plane.                                                                                                               |
| distance_btw_participants | As the distance between participants could give us an insight on their level of comfort when it comes to deciding to play collaboratively instead of playing alone, we calculated the distance between their nets in the playing plane. |
| arousal_level             | Likert scales value with icon images on either ends to measure the levels of arousal.                                                                                                                                                   |
| valence_level             | Likert scales value with icon images on either ends to measure the levels of valence.                                                                                                                                                   |
| social_status             | The reported level of knowledge of the play peer.                                                                                                                                                                                       |
| desire_to_know_more       | The desire to know more about the peer after playing.                                                                                                                                                                                   |
| pNN50(%)                  | A measure calculated from successive intervals between successive heartbeats (RR interval) differences which is the corresponding relative amount of successive intervals differing more than 50ms.                                     |
| HF(ms <sup>2</sup> )      | HF(ms <sup>2</sup> ) is the absolute power of high-frequency (HF) band.                                                                                                                                                                 |
| HF(n.u.)                  | Power of HF band in normalized unit.                                                                                                                                                                                                    |
| HF(%)                     | Relative powers of HF band.                                                                                                                                                                                                             |
| VLF(Hz)                   | Peak frequency for very low-frequency (VLF) band.                                                                                                                                                                                       |
| LF(ms <sup>2</sup> )      | Absolute power of low-frequency (LF) band.                                                                                                                                                                                              |
| Meanlinelength(beats)     | Mean line length of diagonal lines in recurrence plot.                                                                                                                                                                                  |
| DET                       | Determinism (percentage of recurrence points which form diagonal lines in recurrence plot).                                                                                                                                             |
| LF/HF                     | Ratio between LF and HF band powers. The LF/HF ratio indicates sympathetic activity.                                                                                                                                                    |
| TTPnSCR                   | Number of significant skin conductance responses (SCRs) within the response window (wrw). It represents the phasic activity.                                                                                                            |
| CDASCR                    | Average phasic driver within the response window (wrw). This score represents phasic activity wrw most accurately.                                                                                                                      |
